# Supplementary material for: Synthesis and Printing Features of a Hierarchical Nanocomposite Based on Nickel–Cobalt LDH and Carbonate Hydroxide Hydrate as a Supercapacitor Electrode
Source: MDPI journal article supplement (doi:10.3390/app13105844), 2023-05-09
Supplement: s1 [file s1]

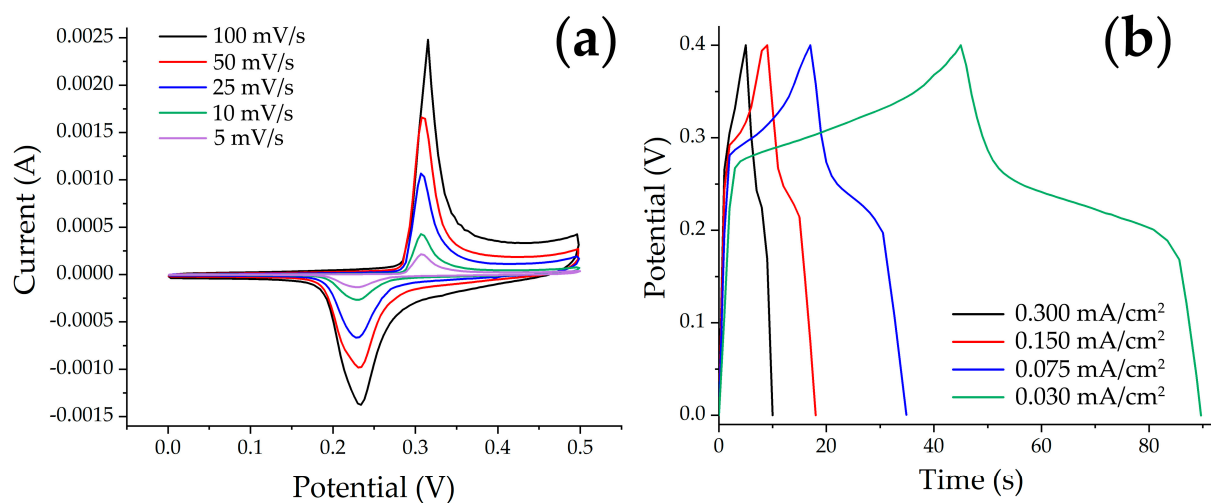

**Figure S1.** Electrochemical characterization of initial nickel-plated steel substrate: CV curves at various scan rates (a), and GCD curves at various current densities (b).

**Table S1.** Comparison of areal capacitance and cycle stability of different Ni-based electrode materials for micro-supercapacitors.

| Electrode Material                                                                                                            | Technology                           | Specific Capacitance                                   | Cyclic Stability    | Reference |
|-------------------------------------------------------------------------------------------------------------------------------|--------------------------------------|--------------------------------------------------------|---------------------|-----------|
| Ni(OH) <sub>2</sub>                                                                                                           | Chemical Bath Deposition             | 16 mF/cm <sup>2</sup> at 62.5 $\mu$ A/cm <sup>2</sup>  | 80% (1000 cycles)   | [71]      |
| Ni(OH) <sub>2</sub>                                                                                                           | Electrodeposition                    | 1.5 mF/cm <sup>2</sup> at 62.5 $\mu$ A/cm <sup>2</sup> | -                   | [71]      |
| Ni-coated cotton textile with low-crystalline Ni-Al layered double hydroxide nanoparticles (NiAl-LDH@NCT)                     | Electrodeposition                    | 311.9 mF/cm <sup>2</sup> at 50 mV/s                    | 75.2% (5000 cycles) | [72]      |
| Surface-modified nickel (Ni) wire/NiCo <sub>2</sub> O <sub>4</sub> /reduced graphene oxide                                    | Wet etching + Hydrothermal synthesis | 27.7 mF/cm <sup>2</sup> at 25 $\mu$ A                  | -                   | [31]      |
| (M(CO <sub>3</sub> ) <sub>0.5</sub> (OH)·0.11H <sub>2</sub> O)/(NiCo-LDH) (where M is Ni <sup>2+</sup> and Co <sup>2+</sup> ) | Hydrothermal synthesis               | 10.1 mF/cm <sup>2</sup> at 0.03 mA/cm <sup>2</sup>     | 93% (2000 cycles)   | This work |
